# Supplementary material for: Probabilistic risk assessment of pesticides under future agricultural and climate scenarios using a Bayesian network
Source: bioRxiv preprint, doi:10.1101/2022.05.30.493954, version 1 (2022-06-02)
Supplement: Supplement Information II [file 493954_file11.xlsx]

## Sheet: WISPE appl scenarios
Application scenarios
Region 1, Østlandet		Høstbygg, høstrug (rug), rughvete									Baseline -50	Baseline	Baseline +50
Kultur	Type middel	Metode	Skadegjører	Handelspreparat	Aktivt stoff	Mengde aktivt stoff	Benevning	Dose (NAD)	Benevning	Dose aktivt stoff (g/daa)	Dose aktivt stoff (kg/ha)	Dose aktivt stoff (kg/ha)	Dose aktivt stoff (kg/ha)	Sprøytetidspunkt - 1. eller 2. halvdel av mnd	Antall behandlinger
Høstkorn	Herbicid	Sprøytemiddel	Div. ugras	Ariane S	MCPA	200	g/L	250	ml/daa	50	0.25	0.5	0.75	1. halvdel av mai	1
					Fluroksypyr-meptyl	40	g/L	250	ml/daa	10	0.05	0.1	0.15	1. halvdel av mai	1
					Klopyralid	20	g/L	250	ml/daa	5	0.025	0.05	0.075	1. halvdel av mai	1
Høstkorn	Fungicid	Sprøytemiddel	Div. sopp	Delaro SC 325	Trifloksystrobin	150	g/L	100	ml/daa	15	0.075	0.15	0.225	1. halvdel av oktober	2	14 d
					Protiokonazol	175	g/L	100	ml/daa	17.5	0.0875	0.175	0.2625	1. halvdel av oktober	2	14 d

## Sheet: EffData_Clopyralid
CAS	Latin_name	Species_group	Effect	Endpoint	Conc1	Unit
1702176	Raphidocelis subcapitata	algae	Population	EC50	6900	ug/L
1702176	Oikomonas termo	algae	Population	LC10	1000	ug/L
1702176	Oikomonas termo	algae	Population	LC50	4000	ug/L
1702176	Selenastrum capricornutum	algae	Population	NOEC	30	ug/L
1702176	Anaxyrus fowleri	amphibians	Mortality	LC50	413000	ug/L
1702176	Anaxyrus fowleri	amphibians	Mortality	NOEC	313000	ug/L
1702176	Ceriodaphnia dubia	crustaceans	Reproduction	NOEC	30	ug/L
1702176	Ceriodaphnia dubia	crustaceans	Mortality	NOEC	30	ug/L
1702176	Pimephales promelas	fish	Mortality	NOEC	30	ug/L
1702176	Pimephales promelas	fish	Growth	NOEC	30	ug/L
1702176	Danio rerio	fish	Growth	NOEC	10000	ug/L
1702176	Danio rerio	fish	Development	NOEC	10000	ug/L
1702176	Danio rerio	fish	Development	NOEC	10000	ug/L
1702176	Danio rerio	fish	Growth	NOEC	10000	ug/L
1702176	Oncorhynchus mykiss	fish	Mortality	LC05	448000	ug/L
1702176	Oncorhynchus mykiss	fish	Mortality	LC10	476000	ug/L
1702176	Oncorhynchus mykiss	fish	Mortality	LC20	532000	ug/L
1702176	Oncorhynchus mykiss	fish	Mortality	LC50	700000	ug/L
1702176	Oncorhynchus mykiss	fish	Growth	NOEC	68000	ug/L
1702176	Oncorhynchus mykiss	fish	Growth	NOEC	273000	ug/L
1702176	Oncorhynchus mykiss	fish	Growth	NOEC	273000	ug/L
1702176	Oncorhynchus mykiss	fish	Growth	NOEC	68000	ug/L
1702176	Oncorhynchus mykiss	fish	Mortality	NOEC	35000	ug/L
1702176	Salvelinus confluentus	fish	Mortality	LC05	458000	ug/L
1702176	Salvelinus confluentus	fish	Mortality	LC10	496000	ug/L
1702176	Salvelinus confluentus	fish	Mortality	LC20	582000	ug/L
1702176	Salvelinus confluentus	fish	Mortality	LC50	802000	ug/L
1702176	Salvelinus confluentus	fish	Mortality	NOEC	40000	ug/L
1702176	Myriophyllum aquaticum	flowers, trees, shrubs, ferns	Population	NOEC	1500	ug/L
1702176	Myriophyllum aquaticum	flowers, trees, shrubs, ferns	Population	NOEC	1500	ug/L
1702176	Colpoda cucullus	invertebratesebrates	Population	LC10	1400	ug/L
1702176	Blepharisma undulans	invertebratesebrates	Population	LC10	10	ug/L
1702176	Colpoda cucullus	invertebratesebrates	Population	LC50	100000	ug/L
1702176	Blepharisma undulans	invertebratesebrates	Population	LC50	100000	ug/L
1702176	Pseudokirchneriella subcapitata	algae	Population	EC50	6900	ug/L
1702176	Oncorhynchus mykiss	fish	Mortality	LC50	700000	ug/L
1702176	Salvelinus confluentus	fish	Mortality	LC50	802000	ug/L
1702176	Oncorhynchus mykiss	fish	Growth	NOEC	273000	ug/L
1702176	Oncorhynchus mykiss	fish	Growth	NOEC	68000	ug/L
1702176	Chironomus sp	invertebrates	Mortality: Effect expressed as % death or % survival. If the author defines criteria used to determine that the organism was dead, then identifies the effect as a lethal effect, MOR will be coded in the effect field.	LC50	750200	ug/L

## Sheet: EffData_Fluroxypyr
CAS	Latin_name	Species_group	Effect	Endpoint	Conc1	Unit
81406373	Raphidocelis subcapitata	algae	Population	EC50	1620	ug/L
81406373	Raphidocelis subcapitata	algae	Population	EC50	1410	ug/L
81406373	Anabaena variabilis	algae	Population	NOEC	50000	ug/L
81406373	Tolypothrix tenuis	algae	Population	NOEC	10000	ug/L
81406373	Raphidocelis subcapitata	algae	Population	NOEL	121	ug/L
81406373	Raphidocelis subcapitata	algae	Population	NOEL	199	ug/L
81406373	Skeletonema costatum	algae	Population	EC50	292	ug/L
81406373	Navicula pelliculosa	algae	Population	EC50	56	ug/L
81406373	Anabaena flosaquae	algae	Population	EC50	395	ug/L
81406373	Skeletonema costatum	algae	Population	NOEL	179	ug/L
81406373	Anabaena flosaquae	algae	Population	NOEL	30	ug/L
81406373	Palaemonetes pugio	crustaceans	Mortality	LC50	135	ug/L
81406373	Penaeus duorarum	crustaceans	Mortality	LC50	128	ug/L
81406373	Penaeus duorarum	crustaceans	Mortality	NOEL	128	ug/L
81406373	Palaemonetes pugio	crustaceans	Mortality	NOEL	135	ug/L
81406373	Oncorhynchus gorbuscha	fish	Mortality	LC50	12000	ug/L
81406373	Oncorhynchus gorbuscha	fish	Mortality	LC50	11000	ug/L
81406373	Oncorhynchus gorbuscha	fish	Mortality	LC50	8000	ug/L
81406373	Lepomis macrochirus	fish	Mortality	LC50	629	ug/L
81406373	Cyprinodon variegatus	fish	Mortality	LC50	87	ug/L
81406373	Menidia menidia	fish	Mortality	LC50	188	ug/L
81406373	Lepomis macrochirus	fish	Mortality	NOEL	629	ug/L
81406373	Menidia menidia	fish	Mortality	NOEL	188	ug/L
81406373	Cyprinodon variegatus	fish	Mortality	NOEL	87	ug/L
81406373	Oncorhynchus tshawytscha	fish	Mortality	LC50	13000	ug/L
81406373	Oncorhynchus tshawytscha	fish	Mortality	LC50	9000	ug/L
81406373	Oncorhynchus kisutch	fish	Mortality	LC50	14000	ug/L
81406373	Oncorhynchus kisutch	fish	Mortality	LC50	10000	ug/L
81406373	Oncorhynchus kisutch	fish	Mortality	LC50	17000	ug/L
81406373	Oncorhynchus tshawytscha	fish	Mortality	LC50	16000	ug/L
81406373	Oncorhynchus mykiss	fish	Mortality	LC50	12000	ug/L
81406373	Oncorhynchus mykiss	fish	Mortality	LC50	17000	ug/L
81406373	Oncorhynchus mykiss	fish	Mortality	LC50	17000	ug/L
81406373	Oncorhynchus nerka	fish	Mortality	LC50	15000	ug/L
81406373	Oncorhynchus keta	fish	Mortality	LC50	10000	ug/L
81406373	Oncorhynchus nerka	fish	Mortality	LC50	13000	ug/L
81406373	Oncorhynchus keta	fish	Mortality	LC50	19000	ug/L
81406373	Oncorhynchus nerka	fish	Mortality	LC50	10000	ug/L
81406373	Oncorhynchus keta	fish	Mortality	LC50	14000	ug/L
81406373	Lemna gibba	flowers, trees, shrubs, ferns	Population	EC50	2310	ug/L
81406373	Lemna gibba	flowers, trees, shrubs, ferns	Population	EC50	1400	ug/L
81406373	Lemna gibba	flowers, trees, shrubs, ferns	Population	NOEL	437	ug/L
81406373	Lemna gibba	flowers, trees, shrubs, ferns	Population	NOEL	1220	ug/L
81406373	Anabaena flos-aquae	algae	Population	NOEL	30	ug/L
81406373	Pseudokirchneriella subcapitata	algae	Population	NOEL	121	ug/L
81406373	Pseudokirchneriella subcapitata	algae	Population	NOEL	199	ug/L
81406373	Anabaena flos-aquae	algae	Population	EC50	395	ug/L
81406373	Oncorhynchus keta	fish	Mortality: Effect expressed as % death or % survival. If the author defines criteria used to determine that the organism was dead, then identifies the effect as a lethal effect, MOR will be coded in the effect field.	LC50	10000	ug/L
81406373	Oncorhynchus kisutch	fish	Mortality: Effect expressed as % death or % survival. If the author defines criteria used to determine that the organism was dead, then identifies the effect as a lethal effect, MOR will be coded in the effect field.	LC50	10000	ug/L
81406373	Oncorhynchus nerka	fish	Mortality: Effect expressed as % death or % survival. If the author defines criteria used to determine that the organism was dead, then identifies the effect as a lethal effect, MOR will be coded in the effect field.	LC50	10000	ug/L
81406373	Oncorhynchus mykiss	fish	Mortality: Effect expressed as % death or % survival. If the author defines criteria used to determine that the organism was dead, then identifies the effect as a lethal effect, MOR will be coded in the effect field.	LC50	12000	ug/L
81406373	Oncorhynchus gorbuscha	fish	Mortality: Effect expressed as % death or % survival. If the author defines criteria used to determine that the organism was dead, then identifies the effect as a lethal effect, MOR will be coded in the effect field.	LC50	8000	ug/L
81406373	Oncorhynchus tshawytscha	fish	Mortality: Effect expressed as % death or % survival. If the author defines criteria used to determine that the organism was dead, then identifies the effect as a lethal effect, MOR will be coded in the effect field.	LC50	9000	ug/L
81406373	Oncorhynchus keta	fish	Mortality	LC50	19000	ug/L
81406373	Oncorhynchus gorbuscha	fish	Mortality	LC50	8000	ug/L
81406373	Oncorhynchus tshawytscha	fish	Mortality	LC50	9000	ug/L
81406373	Oncorhynchus keta	fish	Mortality	LC50	10000	ug/L
81406373	Oncorhynchus kisutch	fish	Mortality	LC50	10000	ug/L
81406373	Oncorhynchus nerka	fish	Mortality	LC50	10000	ug/L
81406373	Oncorhynchus gorbuscha	fish	Mortality	LC50	11000	ug/L
81406373	Oncorhynchus gorbuscha	fish	Mortality	LC50	12000	ug/L
81406373	Oncorhynchus mykiss	fish	Mortality	LC50	12000	ug/L
81406373	Oncorhynchus nerka	fish	Mortality	LC50	13000	ug/L
81406373	Oncorhynchus tshawytscha	fish	Mortality	LC50	13000	ug/L
81406373	Oncorhynchus keta	fish	Mortality	LC50	14000	ug/L
81406373	Oncorhynchus kisutch	fish	Mortality	LC50	14000	ug/L
81406373	Oncorhynchus nerka	fish	Mortality	LC50	15000	ug/L
81406373	Oncorhynchus tshawytscha	fish	Mortality	LC50	16000	ug/L
81406373	Oncorhynchus kisutch	fish	Mortality	LC50	17000	ug/L
81406373	Oncorhynchus mykiss	fish	Mortality	LC50	17000	ug/L

## Sheet: EffData_MCPA
CAS	Latin_name	Species_group	Effect	Endpoint	Conc1	Unit
94746	Ulnaria ulna	algae	Population	EC10	0.6	ug/L
94746	Cymbella sp.	algae	Population	EC10	183	ug/L
94746	Navicula cryptotenella	algae	Population	EC10	500	ug/L
94746	Achnanthidium minutissimum	algae	Population	EC10	6	ug/L
94746	Gomphonema sp.	algae	Population	EC10	0.001	ug/L
94746	Raphidocelis subcapitata	algae	Population	EC10	100000	ug/L
94746	Raphidocelis subcapitata	algae	Population	EC10	100000	ug/L
94746	Encyonema gracile	algae	Population	EC10	0.7	ug/L
94746	Raphidocelis subcapitata	algae	Population	EC100	100000	ug/L
94746	Raphidocelis subcapitata	algae	Population	EC100	100000	ug/L
94746	Raphidocelis subcapitata	algae	Population	EC50	3379	ug/L
94746	Chlamydomonas noctigama	algae	Population	EC50	50000	ug/L
94746	Encyonema gracile	algae	Population	EC50	119	ug/L
94746	Raphidocelis subcapitata	algae	Population	EC50	120000	ug/L
94746	Cryptomonas pyrenoidifera	algae	Population	EC50	15000	ug/L
94746	Zygnema cylindricum	algae	Population	EC50	88000	ug/L
94746	Achnanthidium minutissimum	algae	Population	EC50	500	ug/L
94746	Gomphonema sp.	algae	Population	EC50	0.3	ug/L
94746	Chlorella pyrenoidosa	algae	Population	EC50	21960	ug/L
94746	Raphidocelis subcapitata	algae	Population	EC50	3115	ug/L
94746	Raphidocelis subcapitata	algae	Population	EC50	82000	ug/L
94746	Chlorella fusca var. vacuolata	algae	Population	EC50	160096	ug/L
94746	Scenedesmus acutus var. acutus	algae	Population	EC50	35490.1	ug/L
94746	Ulnaria ulna	algae	Population	EC50	500	ug/L
94746	Raphidocelis subcapitata	algae	Population	EC50	13712.7	ug/L
94746	Chlorella pyrenoidosa	algae	Population	EC50	21670	ug/L
94746	Raphidocelis subcapitata	algae	Population	EC50	71000	ug/L
94746	Raphidocelis subcapitata	algae	Population	EC50	70000	ug/L
94746	Cymbella sp.	algae	Population	EC50	500	ug/L
94746	Navicula cryptotenella	algae	Population	EC50	500	ug/L
94746	Oikomonas termo	algae	Population	LC10	120	ug/L
94746	Oikomonas termo	algae	Population	LC50	2000	ug/L
94746	Algae	algae	Population	NOEC	2006.22	ug/L
94746	Algae	algae	Population	NOEC	2006.22	ug/L
94746	Algae	algae	Population	NOEC	20.0622	ug/L
94746	Algae	algae	Population	NOEC	20.0622	ug/L
94746	Algae	algae	Population	NOEC	2006.22	ug/L
94746	Chlorella fusca var. vacuolata	algae	Population	NOEC	20864.7	ug/L
94746	Raphidocelis subcapitata	algae	Population	NOEC	500	ug/L
94746	Raphidocelis subcapitata	algae	Population	NOEC	1000	ug/L
94746	Algae	algae	Population	NOEC	20.0622	ug/L
94746	Navicula cryptotenella	algae	Population	NOEL	500	ug/L
94746	Cymbella sp.	algae	Population	NOEL	500	ug/L
94746	Eunotia sudetica ssp. incisa	algae	Population	NOEL	500	ug/L
94746	Achnanthidium minutissimum	algae	Population	NOEL	500	ug/L
94746	Gomphonema gracile	algae	Population	NOEL	500	ug/L
94746	Scenedesmus quadricauda	algae	Population	EC50	85100	ug/L
94746	Microcystis aeruginosa	algae	Population	EC50	10000	ug/L
94746	Anabaena flosaquae	algae	Population	EC50	304000	ug/L
94746	Synechococcus leopoliensis	algae	Population	EC50	500	ug/L
94746	Scenedesmus quadricauda	algae	Population	EC50	86100	ug/L
94746	Cyclotella sp.	algae	Population	EC50	7000	ug/L
94746	Rana temporaria	amphibians	Growth	NOEC	12000	ug/L
94746	Rana temporaria	amphibians	Growth	NOEC	12000	ug/L
94746	Rana temporaria	amphibians	Morphology	NOEC	12000	ug/L
94746	Rana temporaria	amphibians	Mortality	NOEC	12000	ug/L
94746	Xenopus laevis	amphibians	Reproduction	NOEL	12539	ug/L
94746	Macrobrachium sp.	crustaceans	Mortality	LC50	1840000	ug/L
94746	Moina macrocopa	crustaceans	Mortality	LC50	40000	ug/L
94746	Moina macrocopa	crustaceans	Mortality	LC50	40000	ug/L
94746	Penaeus duorarum	crustaceans	Mortality	LC50	236000	ug/L
94746	Americamysis bahia	crustaceans	Mortality	LC50	1000	ug/L
94746	Daphnia pulex	crustaceans	Mortality	LC50	40000	ug/L
94746	Daphnia pulex	crustaceans	Mortality	LC50	40000	ug/L
94746	Americamysis bahia	crustaceans	Mortality	NOEL	260	ug/L
94746	Oreochromis niloticus	fish	Mortality	LC50	22	ug/L
94746	Oreochromis mossambicus	fish	Mortality	LC50	620870	ug/L
94746	Gambusia affinis	fish	Mortality	LC50	10000	ug/L
94746	Oreochromis mossambicus	fish	Mortality	LC50	486407	ug/L
94746	Lepomis macrochirus	fish	Mortality	LC50	163500	ug/L
94746	Lepomis macrochirus	fish	Mortality	LC50	6600	ug/L
94746	Cyprinodon variegatus	fish	Mortality	LC50	1920	ug/L
94746	Menidia menidia	fish	Mortality	LC50	179000	ug/L
94746	Lepomis macrochirus	fish	Mortality	LC50	97000	ug/L
94746	Oryzias latipes	fish	Mortality	LC50	40000	ug/L
94746	Lepomis macrochirus	fish	Mortality	LC50	163500	ug/L
94746	Oryzias latipes	fish	Mortality	LC50	40000	ug/L
94746	Lepomis macrochirus	fish	Mortality	LC50	1500	ug/L
94746	Lepomis macrochirus	fish	Mortality	LC50	1500	ug/L
94746	Cyprinodon variegatus	fish	Mortality	NOEL	1920	ug/L
94746	Lepomis macrochirus	fish	Mortality	NOEL	6600	ug/L
94746	Carassius auratus	fish	Mortality	LC50	40000	ug/L
94746	Salmo trutta	fish	Mortality	LC50	300000	ug/L
94746	Cyprinus carpio	fish	Mortality	LC50	40000	ug/L
94746	Carassius auratus	fish	Mortality	LC50	40000	ug/L
94746	Salmo trutta	fish	Mortality	LC50	300000	ug/L
94746	Cyprinus carpio	fish	Mortality	LC50	72520	ug/L
94746	Cyprinus carpio	fish	Mortality	LC50	520000	ug/L
94746	Cyprinus carpio	fish	Mortality	LC50	40000	ug/L
94746	Oncorhynchus mykiss	fish	Mortality	LC50	91000	ug/L
94746	Oncorhynchus mykiss	fish	Mortality	LC50	89000	ug/L
94746	Plantae	flowers, trees, shrubs, ferns	Population	NOEC	560	ug/L
94746	Zostera marina	flowers, trees, shrubs, ferns	Growth	NOEC	2006.22	ug/L
94746	Plantae	flowers, trees, shrubs, ferns	Population	NOEC	560	ug/L
94746	Zostera marina	flowers, trees, shrubs, ferns	Growth	NOEC	2006.22	ug/L
94746	Plantae	flowers, trees, shrubs, ferns	Population	NOEC	560	ug/L
94746	Zizania palustris	flowers, trees, shrubs, ferns	Population	NOEL	4500	ug/L
94746	Zizania palustris	flowers, trees, shrubs, ferns	Reproduction	NOEL	4500	ug/L
94746	Lemna gibba	flowers, trees, shrubs, ferns	Population	EC50	170	ug/L
94746	Lemna gibba	flowers, trees, shrubs, ferns	Population	NOEL	14	ug/L
94746	Lemna minor	flowers, trees, shrubs, ferns	Growth	EC10	248	ug/L
94746	Lemna minor	flowers, trees, shrubs, ferns	Growth	EC10	350	ug/L
94746	Lemna minor	flowers, trees, shrubs, ferns	Growth	EC50	4240	ug/L
94746	Lemna minor	flowers, trees, shrubs, ferns	Growth	EC50	5790	ug/L
94746	Cloeon dipterum	insects/spiders	Mortality	LD50	40000	ug/L
94746	Cloeon dipterum	insects/spiders	Mortality	LD50	40000	ug/L
94746	Cloeon dipterum	insects/spiders	Mortality	LD50	40000	ug/L
94746	Cloeon dipterum	insects/spiders	Mortality	LD50	40000	ug/L
94746	Lissorhoptrus oryzophilus	insects/spiders	Population	NOEC	1200	ug/L
94746	Lissorhoptrus oryzophilus	insects/spiders	Population	NOEC	900	ug/L
94746	Acanthamoeba castellanii	invertebratesebrates	Population	EC10	601.865	ug/L
94746	Spirostomum ambiguum	invertebratesebrates	Morphology	EC50	36800	ug/L
94746	Colpoda cucullus	invertebratesebrates	Population	LC10	1000	ug/L
94746	Blepharisma undulans	invertebratesebrates	Population	LC10	100	ug/L
94746	Spirostomum ambiguum	invertebratesebrates	Mortality	LC50	37400	ug/L
94746	Colpoda cucullus	invertebratesebrates	Population	LC50	100000	ug/L
94746	Blepharisma undulans	invertebratesebrates	Population	LC50	1000	ug/L
94746	Tetrahymena pyriformis	invertebratesebrates	Population	EC10	6.82114e+06	ug/L
94746	Tetrahymena pyriformis	invertebratesebrates	Population	EC50	100311	ug/L
94746	Tetrahymena pyriformis	invertebratesebrates	Population	NOEC	83000	ug/L
94746	Tetrahymena pyriformis	invertebratesebrates	Population	NOEC	83000	ug/L
94746	Tetrahymena pyriformis	invertebratesebrates	Population	NOEC	83000	ug/L
94746	Tetrahymena pyriformis	invertebratesebrates	Population	NOEC	83000	ug/L
94746	Crassostrea virginica	molluscs	Development	EC50	15620	ug/L
94746	Crassostrea virginica	molluscs	Mortality	LC50	114.7	ug/L
94746	Crassostrea virginica	molluscs	Mortality	LC50	31300	ug/L
94746	Crassostrea virginica	molluscs	Mortality	LC50	80	ug/L
94746	Crassostrea virginica	molluscs	Mortality	NOEL	16	ug/L
94746	Crassostrea virginica	molluscs	Mortality	NOEL	15	ug/L
94746	Corbicula manilensis	molluscs	Mortality	LC50	4600000	ug/L
94746	Gambusia affinis	fish	Mortality: Effect expressed as % death or % survival. If the author defines criteria used to determine that the organism was dead, then identifies the effect as a lethal effect, MOR will be coded in the effect field.	LC50	10000	ug/L
94746	Chlorella fusca var vacuolata	algae	Population	EC50	160000	ug/L
94746	Chlorella pyrenoidosa	algae	Population	EC50	22000	ug/L
94746	Scenedesmus acutus var. acutus	algae	Population	EC50	35500	ug/L
94746	Scenedesmus quadricauda	algae	Population	EC50	86100	ug/L
94746	Pseudokirchneriella subcapitata	algae	Photosynthesis: Change in plant productivity indicated by change in 14C or CO2 uptake or oxygen production.	EC50	17800	ug/L
94746	Crassostrea virginica	invertebrates	Mortality: Effect expressed as % death or % survival. If the author defines criteria used to determine that the organism was dead, then identifies the effect as a lethal effect, MOR will be coded in the effect field.	NOEC	5000	ug/L
94746	Crassostrea virginica	invertebrates	Development: Change in ability to grow to a more mature life stage and in time between separate life stages, molting, ability to germinate and cell cleavage.	EC50	15620	ug/L
94746	Lepomis macrochirus	fish	Mortality	LC50	164000	ug/L
94746	Penaeus duorarum	invertebrates	Mortality/Growth	EC50	236000	ug/L
94746	Menidia menidia	fish	Mortality/Growth	EC50	179000	ug/L
94746	Oncorhynchus mykiss	fish	Mortality/Growth	EC50	91000	ug/L
94746	Lepomis macrochirus	fish	Mortality/Growth	EC50	97000	ug/L
94746	Pseudokirchneriella subcapitata	algae	Population	EC50	13700	ug/L
94746	Pseudokirchneriella subcapitata	algae	Population	IC50	18400	ug/L
94746	Pseudokirchneriella subcapitata	algae	Population	IC50	1940	ug/L
94746	Salmo trutta	fish	Mortality	LC50	300000	ug/L
94746	Oncorhynchus mykiss	fish	Mortality: Effect expressed as % death or % survival. If the author defines criteria used to determine that the organism was dead, then identifies the effect as a lethal effect, MOR will be coded in the effect field.	LC50	530	ug/L
94746	Cyprinus carpio	fish	Mortality: Effect expressed as % death or % survival. If the author defines criteria used to determine that the organism was dead, then identifies the effect as a lethal effect, MOR will be coded in the effect field.	LC50	1440	ug/L
94746	Lepomis macrochirus	fish	Mortality: Effect expressed as % death or % survival. If the author defines criteria used to determine that the organism was dead, then identifies the effect as a lethal effect, MOR will be coded in the effect field.	LC50	1500	ug/L
94746	Lepomis macrochirus	fish	Mortality	LC50	1500	ug/L
94746	Carassius sp	fish	Mortality: Effect expressed as % death or % survival. If the author defines criteria used to determine that the organism was dead, then identifies the effect as a lethal effect, MOR will be coded in the effect field.	LC50	45000	ug/L
94746	Tinca tinca	fish	Mortality: Effect expressed as % death or % survival. If the author defines criteria used to determine that the organism was dead, then identifies the effect as a lethal effect, MOR will be coded in the effect field.	LC50	45000	ug/L
94746	Cyprinus carpio	fish	Mortality: Effect expressed as % death or % survival. If the author defines criteria used to determine that the organism was dead, then identifies the effect as a lethal effect, MOR will be coded in the effect field.	LC50	59000	ug/L
94746	Daphnia magna	invertebrates	Mortality: Effect expressed as % death or % survival. If the author defines criteria used to determine that the organism was dead, then identifies the effect as a lethal effect, MOR will be coded in the effect field.	LC50	11000	ug/L
94746	Aedes aegypti	invertebrates	Mortality: Effect expressed as % death or % survival. If the author defines criteria used to determine that the organism was dead, then identifies the effect as a lethal effect, MOR will be coded in the effect field.	LC50	335000	ug/L
94746	Chlamydomonas noctigama	algae	Population	EC50	50000	ug/L
94746	Synechococcus leopoliensis	algae	Population	EC50	500	ug/L
94746	Microcystis aeruginosa	algae	Population	EC50	10000	ug/L
94746	Pseudokirchneriella subcapitata	algae	Population	EC50	120000	ug/L
94746	Tilapia mossambica	fish	Mortality: Effect expressed as % death or % survival. If the author defines criteria used to determine that the organism was dead, then identifies the effect as a lethal effect, MOR will be coded in the effect field.	LC50	486407	ug/L
94746	Oreochromis mossambicus	fish	Mortality	LC50	486000	ug/L
94746	Oreochromis mossambicus	fish	Mortality	LC50	621000	ug/L
94746	Oreochromis niloticus	fish	Mortality	LC50	22	ug/L
94746	Oncorhynchus mykiss	fish	Mortality	LC50	89000	ug/L
94746	Oncorhynchus mykiss	fish	Mortality	LC50	91000	ug/L
94746	Lepomis macrochirus	fish	Mortality	LC50	97000	ug/L
94746	Pseudokirchneriella subcapitata	algae	Population	EC50	70000	ug/L
94746	Pseudokirchneriella subcapitata	algae	Population	EC50	71000	ug/L
94746	Pseudokirchneriella subcapitata	algae	Population	EC50	82000	ug/L
94746	Chlorella pyrenoidosa	algae	Population	EC50	21700	ug/L

## Sheet: EffData_Prothiocanazole
CAS	Latin_name	Species_group	Effect	Endpoint	Conc1	Unit
178928706	Raphidocelis subcapitata	algae	Population	EC50	920	ug/L
178928706	Chlorella pyrenoidosa	algae	Population	EC50	9330	ug/L
178928706	Raphidocelis subcapitata	algae	Population	NOEL	480	ug/L
178928706	Navicula pelliculosa	algae	Population	EC50	164	ug/L
178928706	Anabaena flosaquae	algae	Population	EC50	3500	ug/L
178928706	Skeletonema costatum	algae	Population	EC50	21	ug/L
178928706	Skeletonema costatum	algae	Population	NOEL	7.3	ug/L
178928706	Navicula pelliculosa	algae	Population	NOEL	23.5	ug/L
178928706	Anabaena flosaquae	algae	Population	NOEL	820	ug/L
178928706	Americamysis bahia	crustaceans	Mortality	LC50	2400	ug/L
178928706	Daphnia magna	crustaceans	Growth	NOEC	560	ug/L
178928706	Daphnia magna	crustaceans	Reproduction	NOEC	560	ug/L
178928706	Daphnia magna	crustaceans	Reproduction	NOEC	560	ug/L
178928706	Americamysis bahia	crustaceans	Mortality	NOEL	990	ug/L
178928706	Lepomis macrochirus	fish	Mortality	LC50	4230	ug/L
178928706	Lepomis macrochirus	fish	Mortality	LC50	5530	ug/L
178928706	Cyprinodon variegatus	fish	Mortality	LC50	10300	ug/L
178928706	Cyprinodon variegatus	fish	Mortality	NOEL	10300	ug/L
178928706	Lepomis macrochirus	fish	Mortality	NOEL	2810	ug/L
178928706	Lepomis macrochirus	fish	Mortality	NOEL	1690	ug/L
178928706	Cyprinus carpio	fish	Mortality	LC50	6420	ug/L
178928706	Cyprinus carpio	fish	Mortality	NOEL	910	ug/L
178928706	Oncorhynchus mykiss	fish	Mortality	LC50	1830	ug/L
178928706	Oncorhynchus mykiss	fish	Mortality	LC50	1690	ug/L
178928706	Oncorhynchus mykiss	fish	Mortality	NOEL	990	ug/L
178928706	Oncorhynchus mykiss	fish	Mortality	NOEL	640	ug/L
178928706	Lemna minor	flowers, trees, shrubs, ferns	Growth	EC50	1850	ug/L
178928706	Pseudokirchneriella subcapitata	algae	Population	NOEL	480	ug/L
178928706	Anabaena flos-aquae	algae	Population	NOEL	820	ug/L
178928706	Pseudokirchneriella subcapitata	algae	Population	EC50	920	ug/L
178928706	Anabaena flos-aquae	algae	Population	EC50	3500	ug/L
178928706	Lepomis macrochirus	fish	Mortality	LC50	5530	ug/L
178928706	Cyprinus carpio	fish	Mortality	LC50	6420	ug/L
178928706	Daphnia magna	invertebrates	Intoxication	EC50	1200	ug/L
178928706	Oncorhynchus mykiss	fish	Mortality	LC50	1690	ug/L
178928706	Oncorhynchus mykiss	fish	Mortality	LC50	1830	ug/L
178928706	Lepomis macrochirus	fish	Mortality	LC50	4230	ug/L

## Sheet: EffData_Trifloxystrobin
CAS	Latin_name	Species_group	Effect	Endpoint	Conc1	Unit
141517217	Chlorella pyrenoidosa	algae	Population	EC50	5065	ug/L
141517217	Raphidocelis subcapitata	algae	Population	EC50	37	ug/L
141517217	Raphidocelis subcapitata	algae	Population	NOEL	10.5	ug/L
141517217	Navicula pelliculosa	algae	Population	EC50	8.9	ug/L
141517217	Chlorella vulgaris	algae	Population	EC50	22	ug/L
141517217	Navicula pelliculosa	algae	Population	NOEL	8.9	ug/L
141517217	Elachistocleis bicolor	amphibians	Mortality	LC50	100	ug/L
141517217	Physalaemus santafecinus	amphibians	Mortality	LC50	140	ug/L
141517217	Rhinella arenarum	amphibians	Mortality	LC50	220	ug/L
141517217	Leptodactylus latrans	amphibians	Mortality	LC50	260	ug/L
141517217	Physalaemus santafecinus	amphibians	Mortality	NOEC	96	ug/L
141517217	Elachistocleis bicolor	amphibians	Mortality	NOEC	77	ug/L
141517217	Rhinella arenarum	amphibians	Mortality	NOEC	96	ug/L
141517217	Leptodactylus latrans	amphibians	Mortality	NOEC	180	ug/L
141517217	Xenopus tropicalis	amphibians	Morphology	EC10	0.39	ug/L
141517217	Xenopus tropicalis	amphibians	Development	EC50	13.23	ug/L
141517217	Xenopus tropicalis	amphibians	Morphology	EC50	2.28	ug/L
141517217	Xenopus tropicalis	amphibians	Mortality	LC10	16.21	ug/L
141517217	Xenopus tropicalis	amphibians	Mortality	LC50	30.37	ug/L
141517217	Xenopus tropicalis	amphibians	Mortality	LC50	30.37	ug/L
141517217	Xenopus tropicalis	amphibians	Mortality	NOEC	20.24	ug/L
141517217	Xenopus tropicalis	amphibians	Growth	NOEC	0.31	ug/L
141517217	Xenopus tropicalis	amphibians	Mortality	NOEC	20.24	ug/L
141517217	Daphnia magna	crustaceans	Development	EC50	1.7	ug/L
141517217	Hyalella azteca	crustaceans	Mortality	LC10	12.9	ug/L
141517217	Daphnia magna	crustaceans	Mortality	LC10	380	ug/L
141517217	Daphnia magna	crustaceans	Mortality	LC10	290	ug/L
141517217	Daphnia magna	crustaceans	Mortality	LC10	610	ug/L
141517217	Daphnia magna	crustaceans	Mortality	LC10	360	ug/L
141517217	Daphnia magna	crustaceans	Mortality	LC50	740	ug/L
141517217	Hyalella azteca	crustaceans	Mortality	LC50	24.7	ug/L
141517217	Americamysis bahia	crustaceans	Mortality	LC50	8.62	ug/L
141517217	Daphnia magna	crustaceans	Mortality	LC50	690	ug/L
141517217	Daphnia magna	crustaceans	Mortality	LC50	750	ug/L
141517217	Daphnia magna	crustaceans	Mortality	LC50	530	ug/L
141517217	Daphnia magna	crustaceans	Growth	NOEC	2.76	ug/L
141517217	Hyalella azteca	crustaceans	Mortality	NOEC	18	ug/L
141517217	Americamysis bahia	crustaceans	Mortality	NOEL	3.6	ug/L
141517217	Gobiocypris rarus	fish	Development	NOEC	0.287	ug/L
141517217	Gobiocypris rarus	fish	Growth	NOEC	0.097	ug/L
141517217	Gobiocypris rarus	fish	Mortality	NOEC	0.287	ug/L
141517217	Gobiocypris rarus	fish	Mortality	NOEC	0.624	ug/L
141517217	Gobiocypris rarus	fish	Mortality	NOEC	0.287	ug/L
141517217	Gobiocypris rarus	fish	Mortality	NOEC	0.624	ug/L
141517217	Gobiocypris rarus	fish	Growth	NOEC	0.097	ug/L
141517217	Gobiocypris rarus	fish	Mortality	NOEC	0.624	ug/L
141517217	Gobiocypris rarus	fish	Development	NOEC	0.624	ug/L
141517217	Gobiocypris rarus	fish	Mortality	NOEC	0.287	ug/L
141517217	Gobiocypris rarus	fish	Development	NOEC	0.624	ug/L
141517217	Gobiocypris rarus	fish	Development	NOEC	0.287	ug/L
141517217	Lepomis macrochirus	fish	Mortality	LC50	54	ug/L
141517217	Cyprinodon variegatus	fish	Mortality	LC50	78	ug/L
141517217	Danio rerio	fish	Mortality	LC50	1061.78	ug/L
141517217	Danio rerio	fish	Mortality	LC50	55	ug/L
141517217	Oryzias latipes	fish	Growth	NOEC	100	ug/L
141517217	Oryzias latipes	fish	Mortality	NOEC	10	ug/L
141517217	Oryzias latipes	fish	Development	NOEC	10	ug/L
141517217	Danio rerio	fish	Growth	NOEC	318.534	ug/L
141517217	Cyprinodon variegatus	fish	Mortality	NOEL	32.3	ug/L
141517217	Lepomis macrochirus	fish	Mortality	NOEL	28	ug/L
141517217	Cyprinus carpio	fish	Mortality	LC0	56	ug/L
141517217	Cyprinus carpio	fish	Mortality	LC16	73	ug/L
141517217	Cyprinus carpio	fish	Mortality	LC50	90	ug/L
141517217	Oncorhynchus mykiss	fish	Mortality	LC50	14	ug/L
141517217	Oncorhynchus mykiss	fish	Mortality	NOEC	4.3	ug/L
141517217	Oncorhynchus mykiss	fish	Mortality	NOEL	7.2	ug/L
141517217	Ctenopharyngodon idella	fish	Mortality	LC50	51	ug/L
141517217	Ctenopharyngodon idella	fish	Mortality	LC95	99	ug/L
141517217	Lemna gibba	flowers, trees, shrubs, ferns	Population	EC50	1930	ug/L
141517217	Lemna gibba	flowers, trees, shrubs, ferns	Population	NOEL	410	ug/L

## Sheet: BNinput_effect
Clopyralid
	mean	sd	total n collected	total n used		interval discretisation
chronic	7.73139	3.67783	18	7		chronic	[2, 14]/10
acute	11.4492	1.98615	7	7		acute	[8, 14]/10
							[2, 14]/ 10	[7.389056, 1202604] /L 10
Fluroxypyr
	mean	sd	total n collected	total n used		interval discretisation
chronic	6.02884	2.08816	13	11		chronic	[2, 12]/10
acute	7.08131	2.05689	30	16		acute	[4, 10] /10
							[2, 12]/ 10	[7.389056, 162754.8] /L 10
MCPA
	mean	sd	total n collected	total n used		interval discretisation
chronic	7.06557	2.09505	38	20		chronic	[2,12]/ 10
acute	9.55476	3.10488	75	45		acute	[0, 15]/10
							[0,15]/10	[1, 3269017] /L 10
Trifloxystrobin
	mean	sd	total n collected	total n used		interval discretisation
chronic	3.18	1.77	40	17		chronic	[0, 6]/ 10
acute	4.51739	1.71833	27	19		acute	[2, 9]/ 10
							[0,9]/ 10	[1, 8103.084] /L 10
Prothiocanazole
	mean	sd	total n collected	total n used		interval discretisation
chronic	6.17288	1.99836	14	10		chronic	[0, 10]/ 10
acute	7.41359	1.77906	13	11		acute	[3, 10]/ 10
							[0, 10]/ 10	[1, 22026.47] /L 10

## Sheet: CPT_Exp_Clopyralid
Scenario	climate scenario	application scenario	mean_slope	sd_slope		intervals
					[-6,-5.5)	[-5.5,-5)	[-5,-4.5)	[-4.5,-4)	[-4,-3.5)	[-3.5,-3)	[-3,-2.5)	[-2.5,-2)	[-2,-1.5)	[-1.5,-1)	[-1,-0.5)	[-0.5,0)	[0,0.5)	[0.5,1)	SUM
1	C1_30	ASWC	-1.08	0.0563			5	18	1	3	1	2							30
2	C1_30	ASWC+50	-1.08	0.0565					22	2	2	1	2	1					30
3	C1_30	ASWC-50	-1.08	0.0653	14	9	2	2	1	2									30
4	C1_65	ASWC	-1.08	0.051			3	19	6	1			1						30
5	C1_65	ASWC+50	-1.09	0.0547					21	4	3		1	1					30
6	C1_65	ASWC-50	-1.09	0.0547	14	10	2	2	1	1									30
7	C1_100	ASWC	-1.09	0.0578			3	19	3	1	1	1	2						30
8	C1_100	ASWC+50	-1.08	0.058					24	2	1	1	1		1				30
9	C1_100	ASWC-50	-1.08	0.0581	16	9	2	1		1	1								30
10	C2_30	ASWC	-1.06	0.0651			4	18	3	4	1								30
11	C2_30	ASWC+50	-1.06	0.0653					17	8	3	2							30
12	C2_30	ASWC-50	-1.06	0.0651	12	10	3	4	1										30
13	C2_65	ASWC	-1.07	0.0526			5	14	3	5	1	2							30
14	C2_65	ASWC+50	-1.07	0.0525					17	4	4	2	2	1					30
15	C2_65	ASWC-50	-1.07	0.0525	11	9	3	4	2	1									30
16	C2_100	ASWC	-1.08	0.0642			3	11	5	2	6	1	1				1		30
17	C2_100	ASWC+50	-1.08	0.0642					13	3	5	4	3	1				1	29
18	C2_100	ASWC-50	-1.08	0.0641	10	5	4	5	3	1	1	1							30

## Sheet: CPT_Exp_Fluroxypyr
Scenario	climate scenario	application scenario	mean_slope	sd_slope	intervals
					[-5.5,-5)	[-5,-4.5)	[-4.5,-4)	[-4,-3.5)	[-3.5,-3)	[-3,-2.5)	[-2.5,-2)	[-2,-1.5)	[-1.5,-1)	[-1,-0.5)	[-0.5,0)	[0,0.5)	[0.5,1)	[1,1.5)	[1.5,2)	SUM
1	C1_30	ASWC	-1.14	0.0168					24	2	1	2	1							0
2	C1_30	ASWC+50	-1.14	0.0169						23	3		3	1						0
3	C1_30	ASWC-50	-1.14	0.017			24	2	2	1	1									0
4	C1_65	ASWC	-1.14	0.0272					24	2	3	1								0
5	C1_65	ASWC+50	-1.14	0.0273						20	6	2	1		1					0
6	C1_65	ASWC-50	-1.14	0.0272			24	3	2			1								0
7	C1_100	ASWC	-1.14	0.0203					26	1	1		1		1					0
8	C1_100	ASWC+50	-1.14	0.0204						24	3	1		1		1				0
9	C1_100	ASWC-50	-1.14	0.0203			26	2		1		1								0
10	C2_30	ASWC	-1.14	0.0237					18	4	2	2	2	1				1		0
11	C2_30	ASWC+50	-1.14	0.0188						20	8	1	1							0
12	C2_30	ASWC-50	-1.14	0.0188			27	1	1	1										0
13	C2_65	ASWC	-1.12	0.042					22	5	2		1							0
14	C2_65	ASWC+50	-1.13	0.042						19	6	4		1						0
15	C2_65	ASWC-50	-1.13	0.0421			22	6	1		1									0
16	C2_100	ASWC	-1.14	0.0237					18	4	2	2	2	1				1		0
17	C2_100	ASWC+50	-1.14	0.0237						15	7	1	2	3	1				1	0
18	C2_100	ASWC-50	-1.14	0.0238			19	3	3	3		1				1				0

## Sheet: CPT_Exp_MCPA
Scenario	climate scenario	application scenario	mean_slope	sd_slope	intervals (counts)
					[-5.5,-5)	[-5,-4.5)	[-4.5,-4)	[-4,-3.5)	[-3.5,-3)	[-3,-2.5)	[-2.5,-2)	[-2,-1.5)	[-1.5,-1)	[-1,-0.5)	[-0.5,0)	[0,0.5)	[0.5,1)	[1, 1.5)	[1.5, 2)	[2,2.5)		SUM
1	C1_30	ASWC	-0.999	0.0552									4	20	1	3	1	1				0
2	C1_30	ASWC+50	-0.998	0.057											23	1	3	2	1			0
3	C1_30	ASWC-50	-1	0.0525							11	13	2	3	1							0
4	C1_65	ASWC	-0.997	0.446									2	23	5							0
5	C1_65	ASWC+50	-0.995	0.0456											22	8						0
6	C1_65	ASWC-50	-1	0.0456							9	17	4									0
7	C1_100	ASWC	-1	0.0482										22	2	1	3	1	1			0
8	C1_100	ASWC+50	-1	0.0514											20	4	1	2	2	1		0
9	C1_100	ASWC-50	-1	0.469							8	14	1	3	2	1	1					0
10	C2_30	ASWC	-1	0.0547									2	21	3	2	2					0
11	C2_30	ASWC+50	-1	0.0549											20	6	1	1	1	1		0
12	C2_30	ASWC-50	-1.01	0.0522							9	15	3	1	2							0
13	C2_65	ASWC	-0.961	0.0492									3	16	7	3	1					0
14	C2_65	ASWC+50	-0.962	0.0513											15	10	4	1				0
15	C2_65	ASWC-50	-0.963	0.0478							9	13	6	2								0
16	C2_100	ASWC	-0.99	0.0698									2	13	4	7	2	2				0
17	C2_100	ASWC+50	-0.995	0.0686											13	6	1	8	1	1		0
18	C2_100	ASWC-50	-0.98	0.0682							6	10	5	6	1		2					0

[truncated: 2 more sheets: CPT_Exp_Prothiocanazole, CPT_Exp_Trifloxystrobin]
